# Supplementary material for: Synthesis of new Pro-PYE ligands as co-catalysts toward Pd-catalyzed Heck–Mizoroki cross coupling reactions
Source: Royal Society of Chemistry journal article supplement (doi:10.1039/c9ra07912b), 2019-01-01
Supplement: c9ra07912b1.pdf [file c9ra07912b1.pdf]

**Synthesis of New Pro-PYE Ligands as Co-Catalysts toward Pd-Catalyzed Heck-  
Mizoroki Cross Coupling Reactions**

Naima Munir<sup>1</sup>, Muhammad Naveed Zafar<sup>1\*</sup>, Sara Masood<sup>1</sup>, Faroha Liaqat<sup>1</sup>, Muhammad Tahir<sup>2</sup>, SammerYousuf<sup>3</sup>, Saima Kalsoom<sup>4</sup>, Ehsan Ullah Mughal<sup>5</sup>, Sajjad Sumrra<sup>5</sup>, Aneela Maalik<sup>6\*</sup>

<sup>1</sup>*Department of Chemistry, Quaid-i-Azam University, Islamabad-45320, Pakistan.*

<sup>2</sup>*Department of Physics, University of Sargodha, Sargodha-40100, Pakistan*

<sup>3</sup>*H. E. J. Research Institute of Chemistry, International Centre for Chemical and Biological Sciences, University of Karachi-75270, Pakistan.*

<sup>4</sup>*Centre for Interdisciplinary Research in Basic Sciences (CIRBS), International Islamic University, Islamabad, Pakistan.*

<sup>5</sup>*Department of Chemistry, University of Gujrat, Gujrat-50700, Pakistan.*

<sup>6</sup>*Department of Chemistry, COMSATS University Islamabad, Islamabad Campus, Park Road, Islamabad-45550, Pakistan.*

\*Correspondence: Aneela Maalik, [aneela.maalik@comsats.edu.pk](mailto:aneela.maalik@comsats.edu.pk), Tel.: +923335490834;  
Muhammad Naveed Zafar, [mnzafar@qau.edu.pk](mailto:mnzafar@qau.edu.pk), Tel.: +923314503061

DR.NAVEED ZAFAR/NAIMA/NA-03\_1HNMR\_DMSO

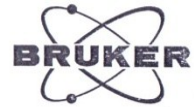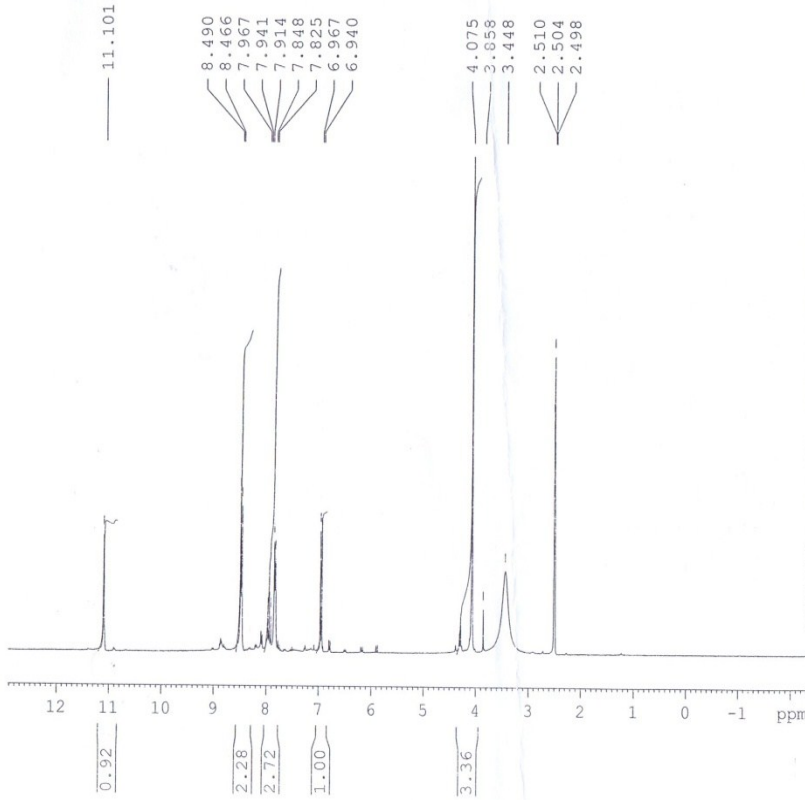

Current Data Parameters  
 NAME NA-03\_1HNMR\_DMSO  
 EXPNO 1  
 PROCNO 1

F2 - Acquisition Parameters  
 Date\_ 20170804  
 Time\_ 10.41  
 INSTRUM spect  
 PROBHD 5 mm BBO BB-1H  
 PULPROG zg30  
 TD 65536  
 SOLVENT DMSO  
 NS 8  
 DS 0  
 SWH 6172.839 Hz  
 FIDRES 0.094190 Hz  
 AQ 5.3084660 sec  
 RG 406.4  
 DW 81.000 usec  
 DE 6.00 usec  
 TE 296.4 K  
 D1 1.00000000 sec  
 TDO 1

----- CHANNEL f1 -----  
 NUC1 1H  
 P1 9.00 usec  
 PL1 2.00 dB  
 SFO1 300.1318534 MHz

F2 - Processing parameters  
 SI 32768  
 SF 300.1300000 MHz  
 WDW EM  
 SSB 0  
 LB 0.30 Hz  
 GB 0  
 PC 1.00

DR.NAVEED ZAFAR/NAIMA/NA-03P\_13CNMR\_DMSO

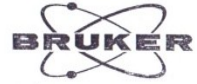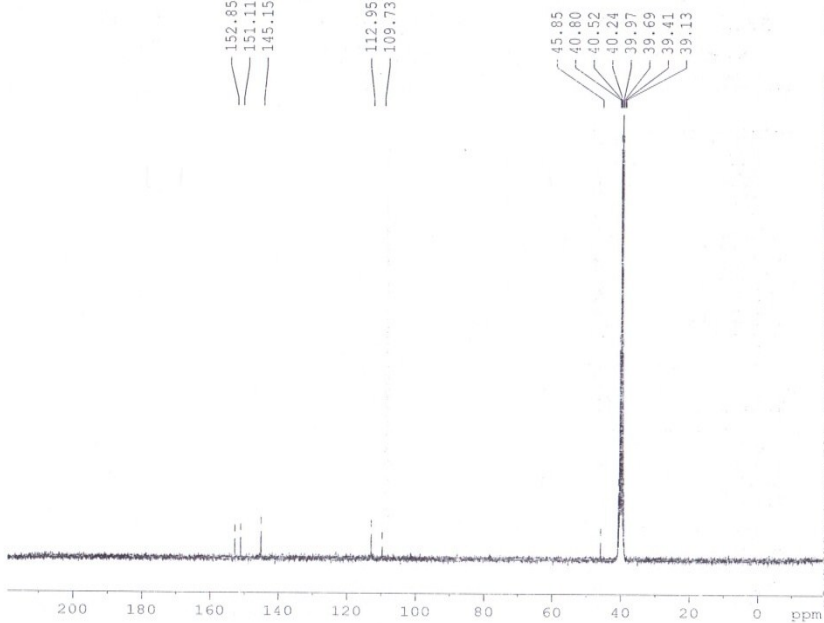

Current Data Parameters  
 NAME NA-03P\_13CNMR\_DMSO  
 EXPNO 1  
 PROCNO 1

F2 - Acquisition Parameters  
 Date\_ 20171114  
 Time\_ 13.03  
 INSTRUM spect  
 PROBHD 5 mm BBO BB-1H  
 PULPROG zgpg30  
 TD 35968  
 SOLVENT DMSO  
 NS 512  
 DS 0  
 SWH 17985.611 Hz  
 FIDRES 0.300045 Hz  
 AQ 0.3999604 sec  
 RG 3649.1  
 DW 27.500 usec  
 DE 6.00 usec  
 TE 294.4 K  
 D1 2.00000000 sec  
 d11 0.03000000 sec  
 DELTA 1.89999998 sec  
 TDO 1

----- CHANNEL f1 -----  
 NUC1 13C  
 P1 6.00 usec  
 PL1 -5.00 dB  
 SFO1 75.4752953 MHz

----- CHANNEL f2 -----  
 CDPORG2 waltz16  
 NUC2 1H  
 PCPD2 80.00 usec  
 PL2 2.00 dB  
 PL12 20.98 dB  
 PL13 20.00 dB  
 SFO2 300.1312005 MHz

F2 - Processing parameters  
 SI 32768  
 SF 75.4677490 MHz  
 WDW EM  
 SSB 0  
 LB 1.00 Hz  
 GB 0  
 PC 1.40

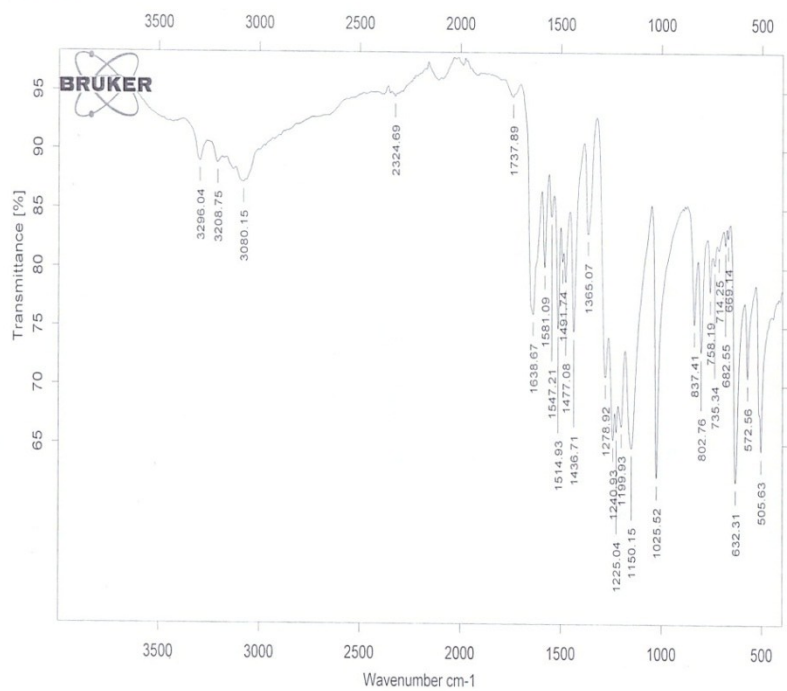

Sample Name: NA 03P

**Figure S1:**  $^1\text{H}$ ,  $^{13}\text{C}$ NMR, IR spectra of  $[\text{H}_2\text{L}][\text{OTf}]_2$

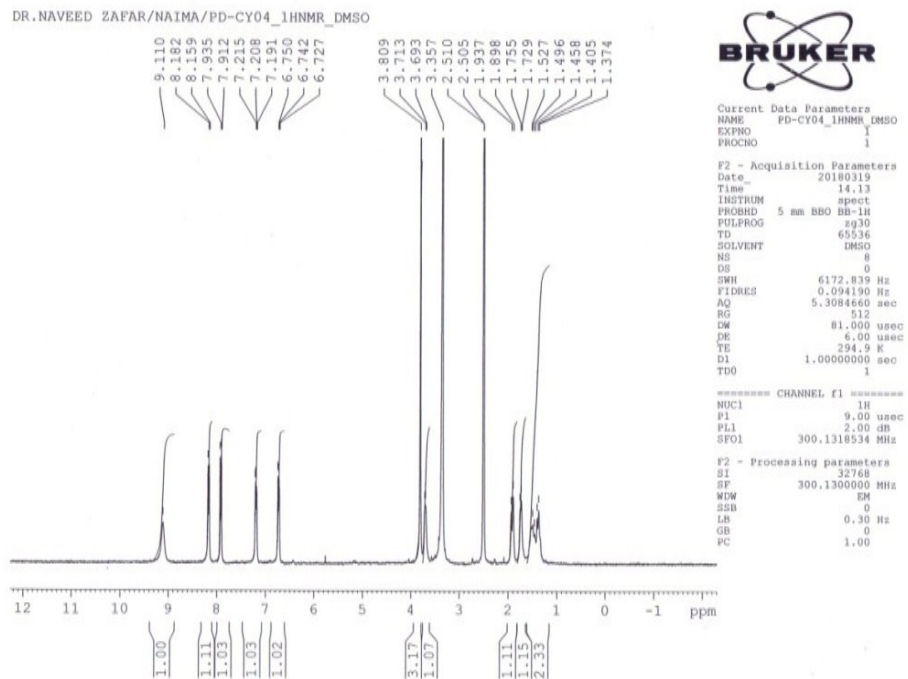

DR.NAVEED ZAFAR/NAIMA/PD-CY04\_13CNMR\_DMSO

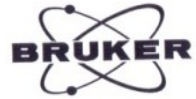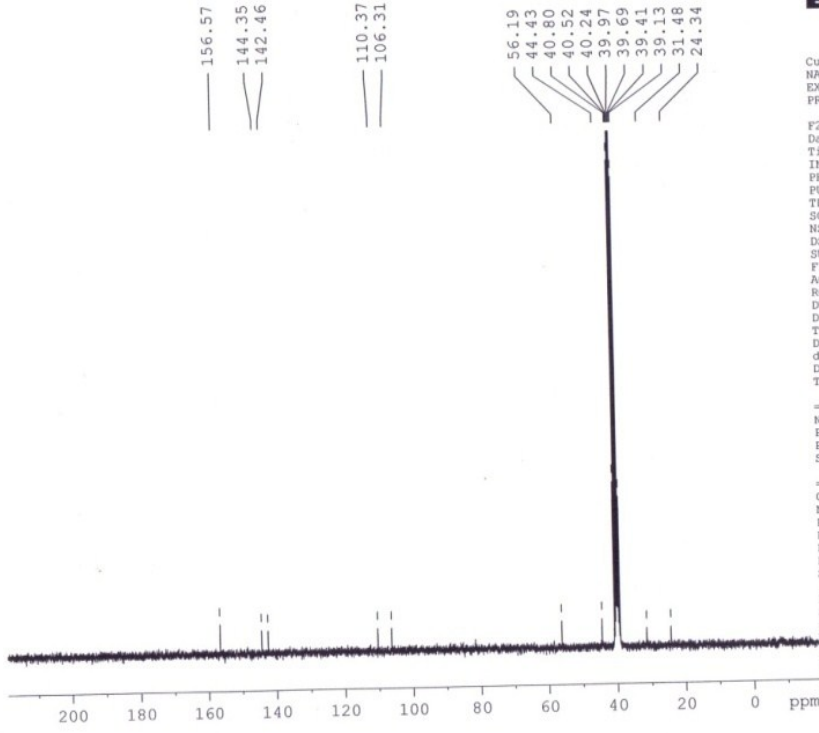

Current Data Parameters  
NAME PD-CY04\_13CNMR\_DMSO  
EXPNO 1  
PROCNO 1

F2 - Acquisition Parameters  
Date\_ 20180319  
Time 15.07  
INSTRUM spect  
PROBHD 5 mm BBO BB-1H  
PULPROG zgpg30  
TD 35968  
SOLVENT DMSO  
NS 1024  
DS 0  
SWH 17985.611 Hz  
FIDRES 0.500045 Hz  
AQ 0.9999604 sec  
RG 26008  
DW 27.800 usec  
DE 6.00 usec  
TE 295.5 K  
D1 2.0000000 sec  
d11 0.0300000 sec  
DELTA 1.89999998 sec  
TDO 1

----- CHANNEL f1 -----  
NUC1 13C  
P1 6.00 usec  
PL1 -5.00 dB  
SFO1 75.4752953 MHz

----- CHANNEL f2 -----  
CPDPRG2 waltz16  
NUC2 1H  
PCPD2 80.00 usec  
PL2 2.00 dB  
PL12 20.98 dB  
PL13 20.00 dB  
SFO2 300.1312005 MHz

F2 - Processing parameters  
SI 32768  
SF 75.4677490 MHz  
WDW EM  
SSB 0  
LB 1.00 Hz  
GB 0  
PC 1.40

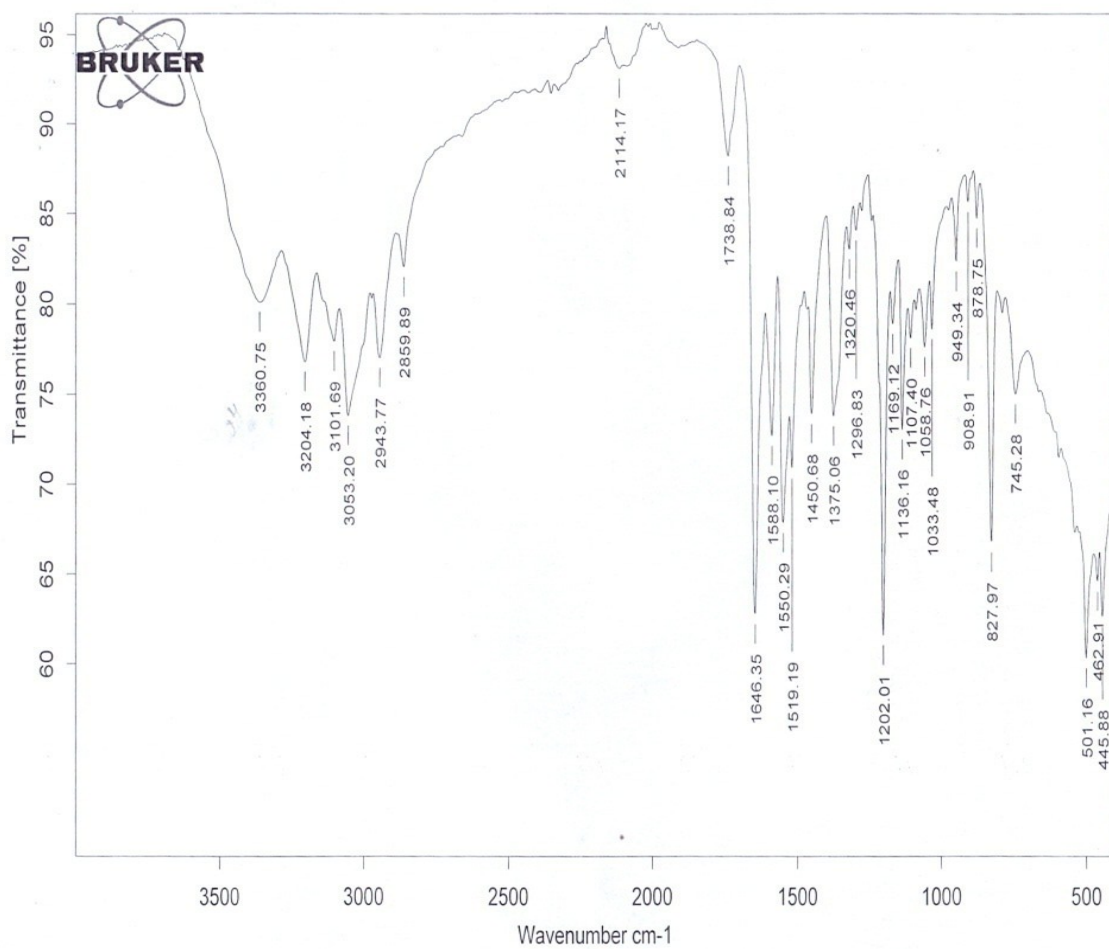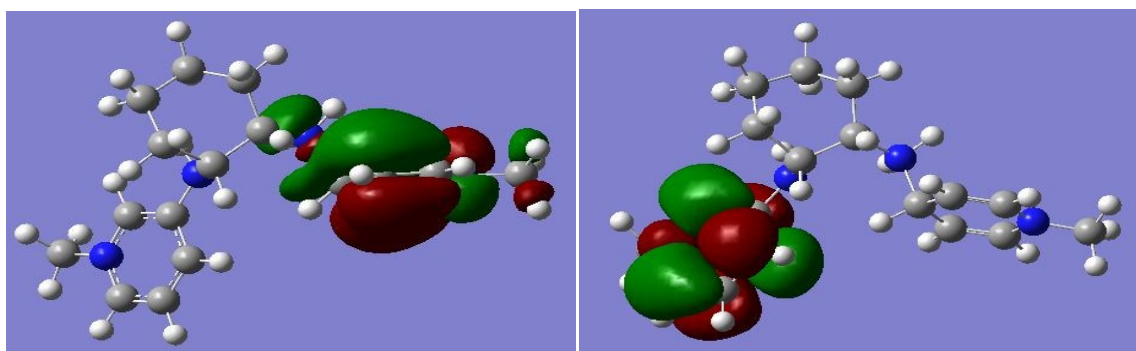

HOMO (Gaussian)

LUMO (Gaussian)

**Figure S2:** <sup>1</sup>H, <sup>13</sup>CNMR, IR spectra and HOMO-LUMO of [H<sub>2</sub>L<sup>2</sup>][OTf]<sub>2</sub>

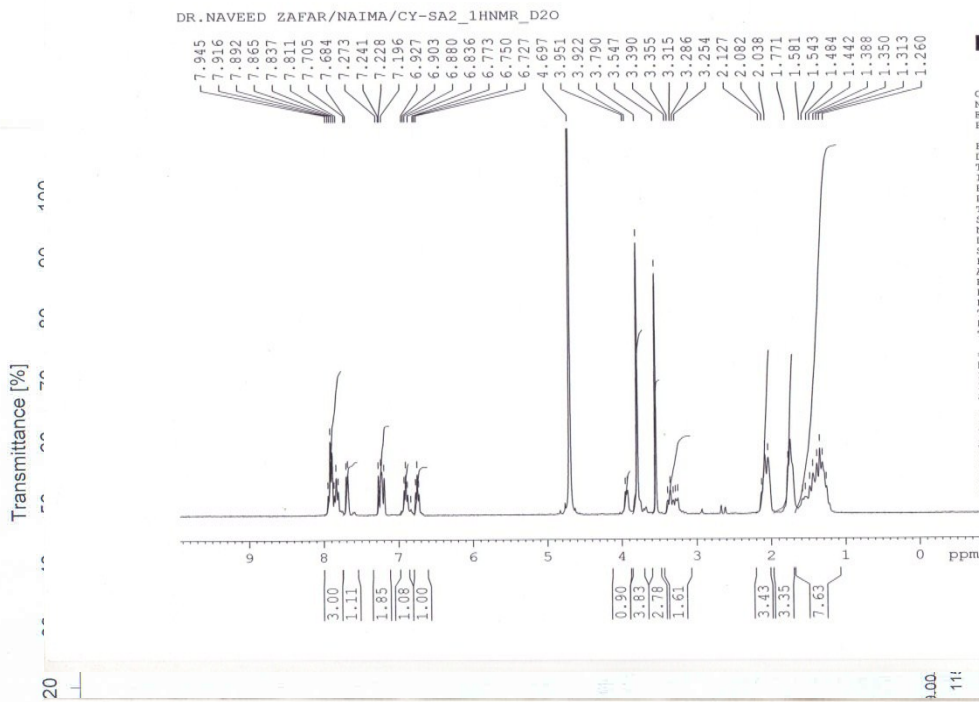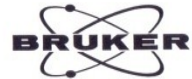

Current Data Parameters  
 NAME CY-SA2\_1HNMR\_D2O  
 EXPNO 1  
 PROCNO 1

F2 - Acquisition Parameters  
 Date\_ 20180118  
 Time\_ 14.33  
 INSTRUM spect  
 PROBHD 5 mm BBO BB-1H  
 PULPROG zg30  
 TD 65536  
 SOLVENT D2O  
 NS 8  
 DS 0  
 SWH 6172.839 Hz  
 FIDRES 0.094190 Hz  
 AQ 5.3084660 sec  
 RG 362  
 DW 81.000 usec  
 DE 6.00 usec  
 TE 293.5 K  
 D1 1.0000000 sec  
 TDO 1

----- CHANNEL f1 -----  
 NUC1 1H  
 P1 9.00 usec  
 PL1 2.00 dB  
 SFO1 300.1318534 MHz

F2 - Processing parameters  
 SI 32768  
 SF 300.1300000 MHz  
 WDW EM  
 SSB 0  
 LB 0.30 Hz  
 GB 0  
 PC 1.00

DR.NAVEED ZAFAR/NAIMA/CY-SA2\_13CNMR\_D2O

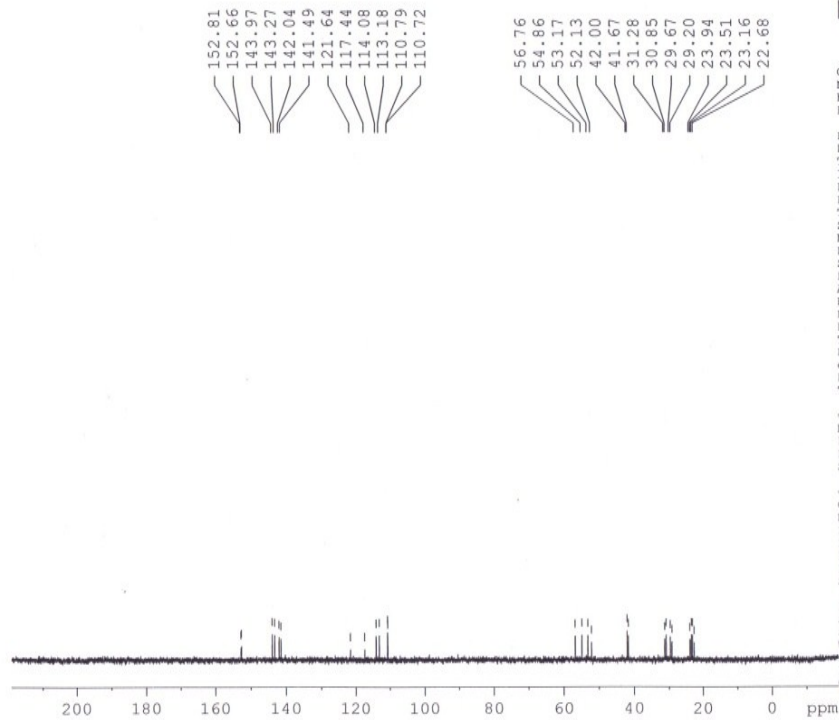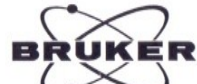

Current Data Parameters  
 NAME CY-SA2\_13CNMR\_D2O  
 EXPNO 1  
 PROCNO 1

F2 - Acquisition Parameters  
 Date\_ 20180118  
 Time\_ 15.26  
 INSTRUM spect  
 PROBHD 5 mm BBO BB-1H  
 PULPROG zgpg30  
 TD 35968  
 SOLVENT D2O  
 NS 1024  
 DS 0  
 SWH 17985.611 Hz  
 FIDRES 0.500045 Hz  
 AQ 0.9999604 sec  
 RG 32768  
 DW 27.800 usec  
 DE 6.00 usec  
 TE 294.0 K  
 D1 2.0000000 sec  
 d11 0.0300000 sec  
 DELTA 1.89999998 sec  
 TDO 1

----- CHANNEL f1 -----  
 NUC1 13C  
 P1 6.00 usec  
 PL1 -5.00 dB  
 SFO1 75.4752953 MHz

----- CHANNEL f2 -----  
 CPDPRG2 waltz16  
 NUC2 1H  
 PCPD2 80.00 usec  
 PL2 2.00 dB  
 PL12 20.98 dB  
 PL13 20.00 dB  
 SFO2 300.1312005 MHz

F2 - Processing parameters  
 SI 32768  
 SF 75.4677490 MHz  
 WDW EM  
 SSB 0  
 LB 1.00 Hz  
 GB 0  
 PC 1.40

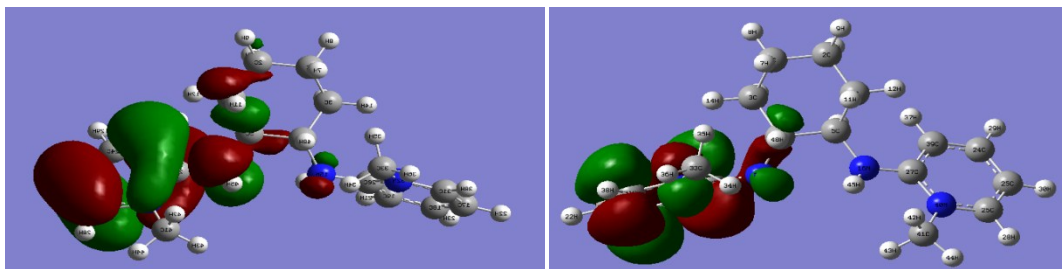

HOMO (Gaussian)

LUMO (Gaussian)

Bond angles

| Concerned Atoms | DR.NAVEED ZAFAR/SARA/SA-10 1HNMR DMSO<br>Experimental | Calculated | Concerned Atoms | Experimental | Calculated |
|-----------------|-------------------------------------------------------|------------|-----------------|--------------|------------|
| C1-N1-C2        | 123.0                                                 | 124.9      | O1-S1-O3        | 114.8        | 113.2      |
| N1-C2-C3        | 123.6                                                 | 122.9      | O2-S1-O1        | 114.3        | 113.8      |
| C2-C3-C4        | 120.6                                                 | 121.4      | O3-S1-O2        | 115.3        | 105.1      |
| C3-C4-C5        | 119.8                                                 | 119.5      | O1-S1-C8        | 103.7        | 106.2      |
| C4-C5-C6        | 119.0                                                 | 118.7      | O3-S1-C8        | 103.8        | 106.5      |
| C5-C6-N2        | 121.7                                                 | 122.0      | O2-S1-C8        | 102.7        | 106.4      |
| C6-N2-C7        | 119.4                                                 | 117.2      | F3-C8-F1        | 107.1        | 110.1      |
| C6-N2-C2        | 120.8                                                 | 121.5      | F2-C8-F3        | 106.0        | 111.3      |
| N2-C2-C3        | 118.0                                                 | 117.0      | F1-C8-F2        | 105.1        | 109.5      |
| C7-N2-C2        | 119.7                                                 | 121.2      | F2-C8-S1        | 112.0        | 106.0      |
| N2-C2-N1        | 118.4                                                 | 120.1      | F3-C8-S1        | 111.8        | 108.5      |

Figure S3: <sup>1</sup>H, <sup>13</sup>CNMR, IR spectra, HOMO-LUMO and bond angles of [H<sub>2</sub>L<sup>3</sup>][OTf]<sub>2</sub>

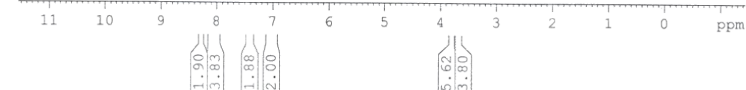

DR.NAVEED ZAFAR/SARA/SA-10 13CNMR DMSO

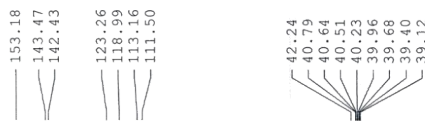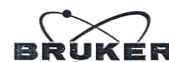

Current Data Parameters  
 NAME SA-10 13CNMR DMSO  
 EXPNO 1  
 PROCNO 1

F2 - Acquisition Parameters  
 Date\_ 20171002  
 Time 11.09  
 INSTRUM spect  
 PROBHD 5 mm BBO BB-1H  
 PULPROG zgpg30  
 TD 32968  
 SOLVENT DMSO  
 NS 179  
 DS 0  
 SWH 17985.611 Hz  
 FIDRES 0.500045 Hz  
 AQ 0.9999604 sec  
 RG 32768  
 DW 27.800 usec  
 DE 6.00 usec  
 TE 295.6 K  
 D1 2.00000000 sec  
 d11 0.03000000 sec  
 DELTA 1.89999998 sec  
 TDO 1

===== CHANNEL f1 =====  
 NUC1 13C  
 P1 6.00 usec  
 PL1 -5.00 dB  
 SFO1 75.475253 MHz

===== CHANNEL f2 =====  
 CPDPRG2 waltz16  
 NUC2 1H  
 PCPD2 80.00 usec  
 PL2 2.00 dB  
 PL12 20.98 dB  
 PL13 20.00 dB  
 SFO2 300.1312005 MHz

F2 - Processing parameters  
 SI 32768  
 SF 75.4677490 MHz  
 WDW EM  
 SSB 0  
 LB 1.00 Hz  
 GB 0  
 PC 1.40

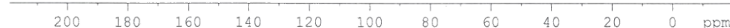

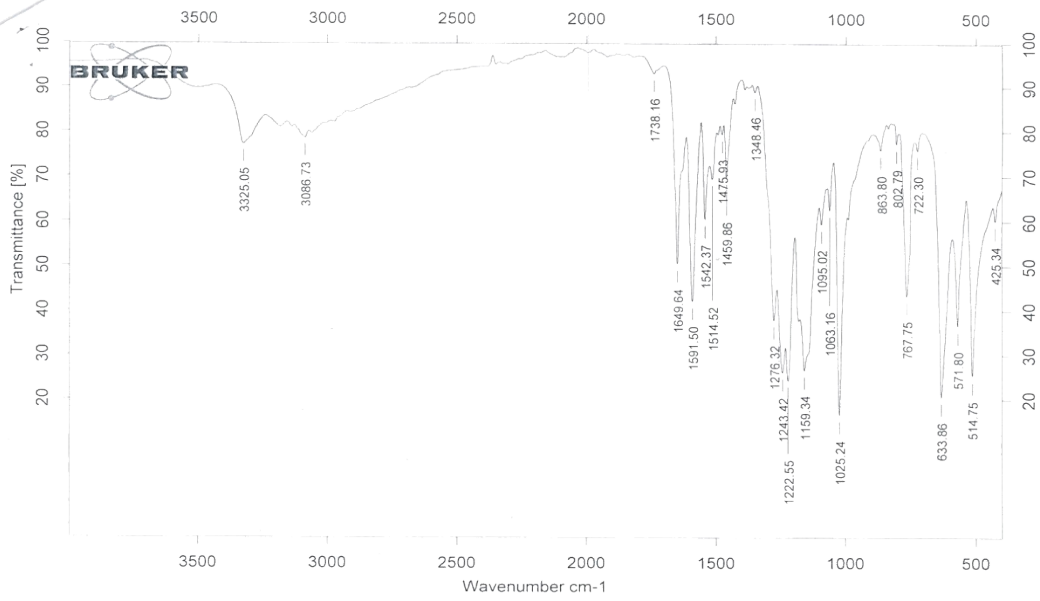

Sample Name: SRM 2B



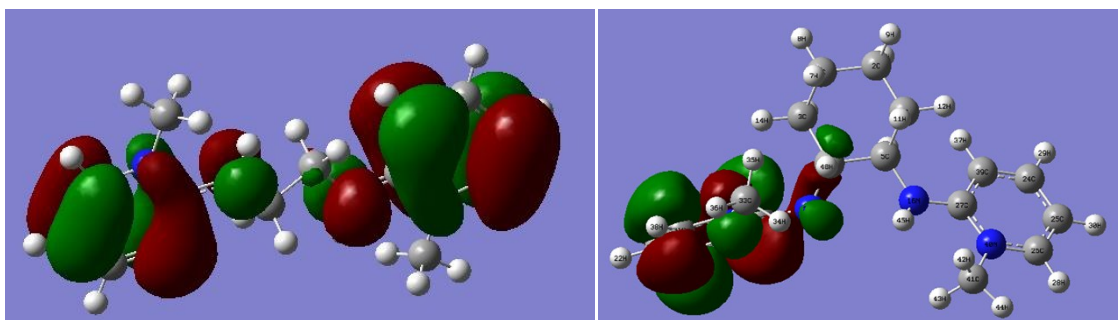

HOMO (Gaussian)

LUMO (Gaussian)

Bond angles

| Atom no's | Experimental | Calculated | Atom no's | Experimental | Calculated |
|-----------|--------------|------------|-----------|--------------|------------|
| C1-N1     | 1.46         | 1.49       | O1-S1     | 1.43         | 1.47       |
| N1-C2     | 1.34         | 1.39       | O2-S1     | 1.43         | 1.39       |
| C2-C3     | 1.40         | 1.41       | S1-C8     | 1.82         | 1.82       |
| C3-C4     | 1.36         | 1.39       | F3-C8     | 1.31         | 1.37       |
| C4-C5     | 1.39         | 1.38       | F1-C8     | 1.33         | 1.36       |
| C5-C6     | 1.34         | 1.38       | F2-C8     | 1.32         | 1.36       |
| C6-N2     | 1.36         | 1.35       | C1-C1     | 1.51         | 2.19       |
| N2-C7     | 1.46         | 1.48       | N2-C2     | 1.36         | 1.38       |
| N2-C2     | 1.36         | 1.38       | O3-S1     | 1.42         | 1.47       |
| O3-S1     | 1.42         | 1.47       | O1-S1     | 1.43         | 1.47       |

Figure S4: <sup>1</sup>H, <sup>13</sup>CNMR, IR spectra, HOMO-LUMO & bond angles of [H<sub>2</sub>L<sup>4</sup>][OTf]<sub>2</sub>

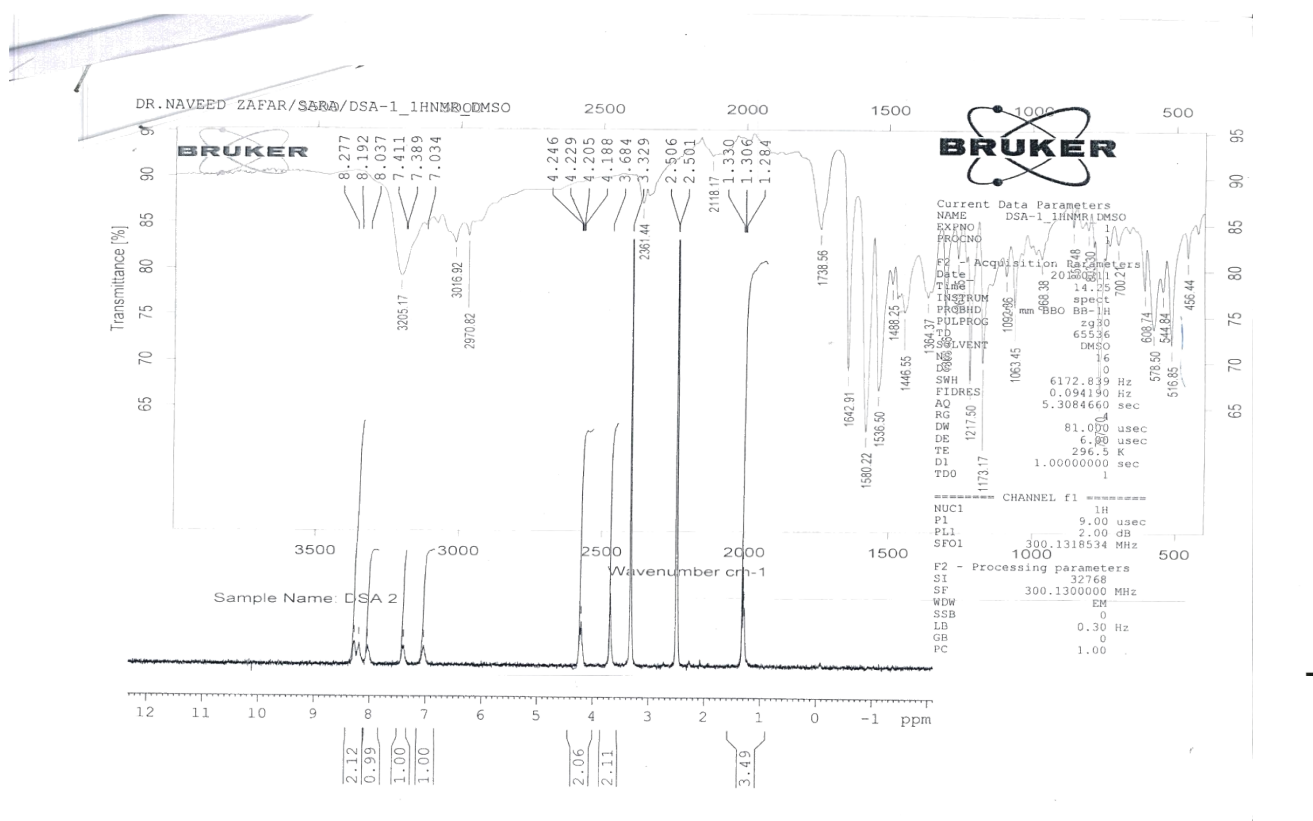

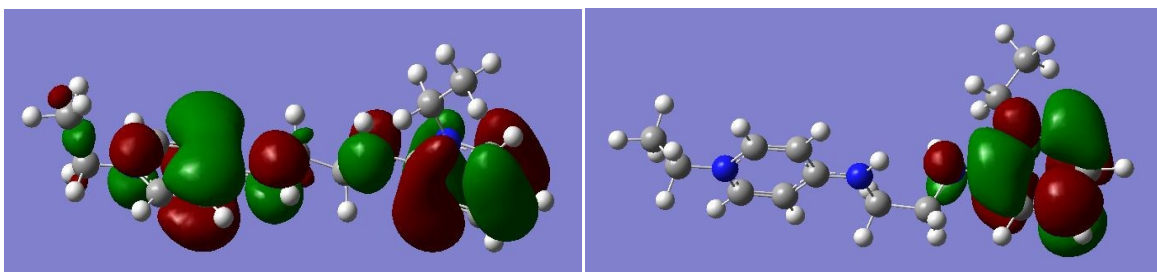

HOMO (Gaussian)

LUMO (Gaussian)

### Bond angles

| Concerned Atoms | Experimental | Calculated |
|-----------------|--------------|------------|
| C1-N1-C2        | 123.7        | 122.9      |
| N1-C2-C3        | 123.5        | 121.7      |
| C2-C3-C4        | 121.2        | 121.4      |
| C3-C4-C5        | 119.6        | 119.3      |
| C4-C5-C6        | 119.0        | 118.8      |
| C5-C6-N2        | 122.7        | 122.1      |
| C6-N2-C2        | 120.0        | 121.2      |
| N2-C2-C3        | 117.4        | 117.3      |
| N2-C2-N1        | 119.1        | 121.0      |
| C6-N2-C7        | 120.1        | 116.9      |
| N2-C7-C8        | 110.0        | 109.5      |

**Figure S5:**  $^1\text{H}$ ,  $^{13}\text{C}$ NMR, IR spectra, HOMO-LUMO and bond angles of  $[\text{H}_2\text{L}^5][\text{I}]_2$

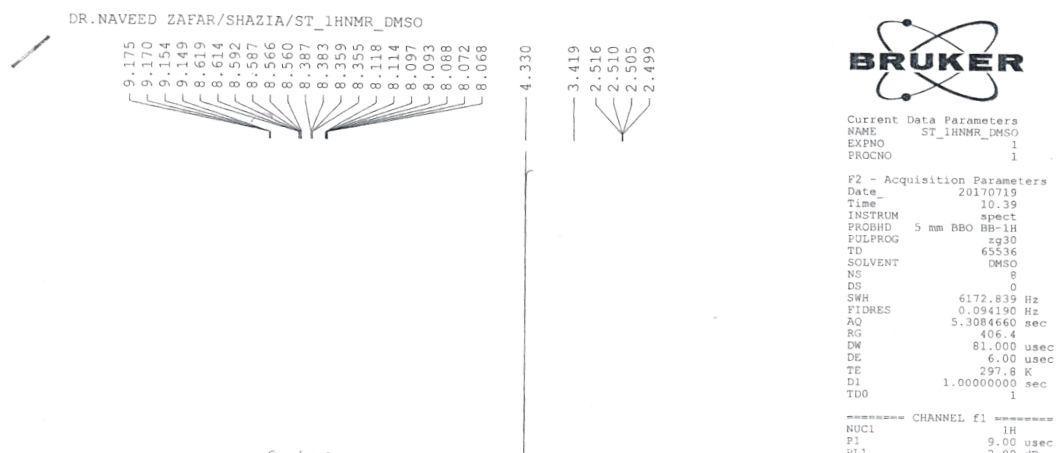

DR.NAVEED ZAFAR/SHAZIA/ST\_13CNMR\_DMSO

148.69  
147.49  
129.93  
126.57  
123.27  
119.00

47.82  
40.82  
40.54  
40.26  
39.98  
39.71  
39.43  
39.15

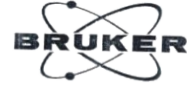

Current Data Parameters  
NAME ST\_13CNMR\_DMSO  
EXPNO 1  
PROCNO 1

F2 - Acquisition Parameters  
Date\_ 20170719  
Time 10.50  
INSTRUM spect  
PROBHD 5 mm BBO BB-1H  
PULPROG zgpg30  
TD 35968  
SOLVENT DMSO  
NS 176  
DS 0  
SWH 17985.611 Hz  
FIDRES 0.500045 Hz  
AQ 0.9999604 sec  
RG 13004  
SW 27.800 usec  
DE 6.00 usec  
TE 300.0 K  
D1 2.00000000 sec  
d11 0.03000000 sec  
DELTA 1.89999998 sec  
TDO 1

----- CHANNEL f1 -----  
NUC1 13C  
P1 6.00 usec  
PL1 -5.00 dB  
SFO1 75.4752953 MHz

----- CHANNEL f2 -----  
CPDPRG2 waltz16  
NUC2 1H  
PCPD2 80.00 usec  
PL2 2.00 dB  
PL12 20.98 dB  
PL13 20.00 dB  
SFO2 300.1312003 MHz

F2 - Processing parameters  
SI 32768  
SF 75.4677490 MHz  
WDW EM  
SSB 0  
LB 1.00 Hz  
GB 0  
PC 1.40

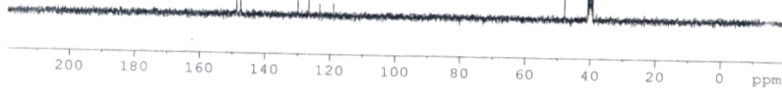

### Bond angles

| Concerned Atoms                                 | Experimental | Calculated | Concerned Atoms | Experimental | Calculated |
|-------------------------------------------------|--------------|------------|-----------------|--------------|------------|
| Cl <sub>1</sub> -C <sub>1</sub> -N <sub>1</sub> | 117.5        | 117.4      | H6B-C6-H6C      | 109.5        | 109.5      |
| C <sub>6</sub> -N <sub>1</sub> -C <sub>5</sub>  | 118.7        | 118.8      | H6B-C6-H6A      | 109.5        | 109.5      |
| C <sub>1</sub> -N <sub>1</sub> -C <sub>5</sub>  | 119.3        | 120.3      | H6A-C6-H6C      | 109.5        | 109.5      |
| C <sub>1</sub> -N <sub>1</sub> -C <sub>6</sub>  | 121.9        | 120.6      | H6C-C6-N1       | 109.5        | 109.5      |
| C <sub>4</sub> -C <sub>5</sub> -N <sub>1</sub>  | 121.3        | 121.3      | H6B-C6-N1       | 109.5        | 109.5      |
| N <sub>1</sub> -C <sub>1</sub> -C <sub>2</sub>  | 121.2        | 119.6      | H6A-C6-N1       | 109.5        | 109.5      |
| C <sub>5</sub> -C <sub>4</sub> -C <sub>3</sub>  | 119.4        | 119.0      | F1-C7-S1        | 112.0        | 111.9      |
| C <sub>4</sub> -C <sub>3</sub> -C <sub>2</sub>  | 119.7        | 119.5      | F3-C7-S1        | 111.4        | 111.6      |
| C <sub>3</sub> -C <sub>2</sub> -C <sub>1</sub>  | 119.0        | 119.0      | O2-S1-O1        | 114.0        | 113.9      |

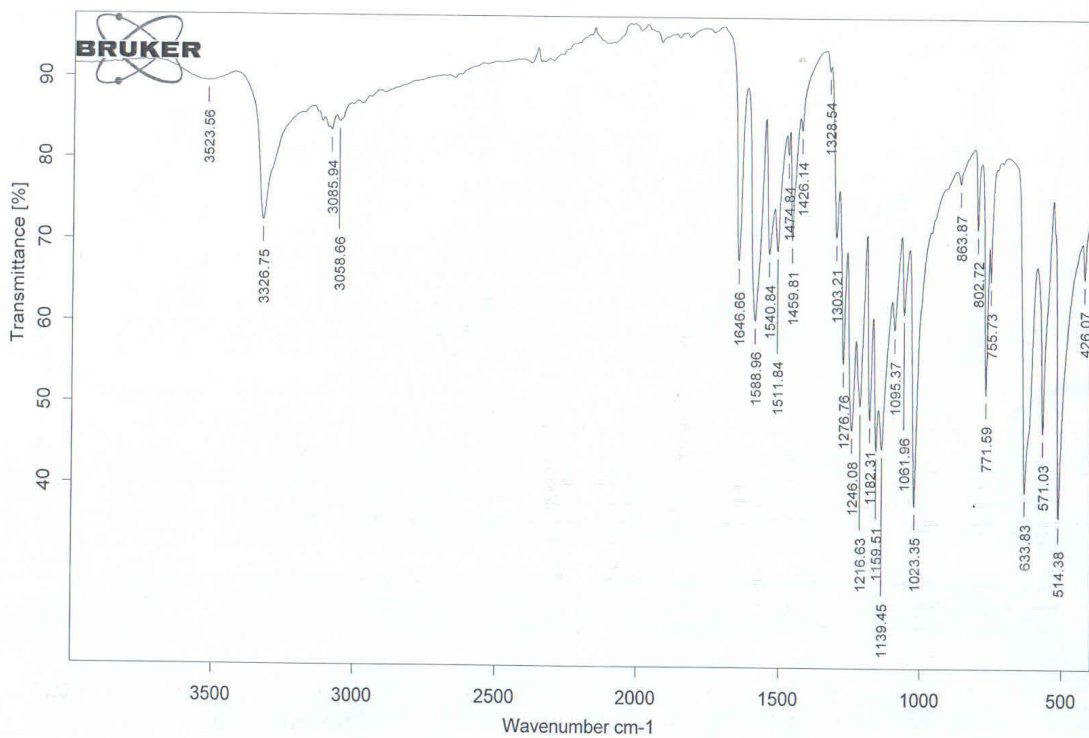

Sample Name: P2 20H

|                  |       |       |                 |       |       |
|------------------|-------|-------|-----------------|-------|-------|
| <b>C11-C1-C2</b> | 121.3 | 118.1 | <b>O3-S1-O1</b> | 115.1 | 115.0 |
| <b>C7-S1-O2</b>  | 103.3 | 106.4 | <b>N1-C5-H5</b> | 119.4 | 119.2 |
| <b>C7-S1-O3</b>  | 103.4 | 106.5 | <b>H5-C5-C4</b> | 119.3 | 119.1 |
| <b>C7-S1-O1</b>  | 103.1 | 106.4 | <b>H2-C2-C3</b> | 120.5 | 120.4 |
| <b>F1-C7-F3</b>  | 108.4 | 112.5 | <b>H2-C2-C1</b> | 120.5 | 120.4 |
| <b>F3-C7-F2</b>  | 109.6 | 113.4 | <b>C2-C3-H3</b> | 120.2 | 120.1 |
| <b>F1-C7-F2</b>  | 106.5 | 105.7 | <b>H3-C3-C4</b> | 120.1 | 120.1 |
| <b>F2-C7-S1</b>  | 112.6 | 107.6 | <b>C5-C4-H4</b> | 120.3 | 120.4 |
| <b>O2-S1-O3</b>  | 115.6 | 114.5 | <b>C3-C4-H4</b> | 120.3 | 120.4 |

### Bond lengths

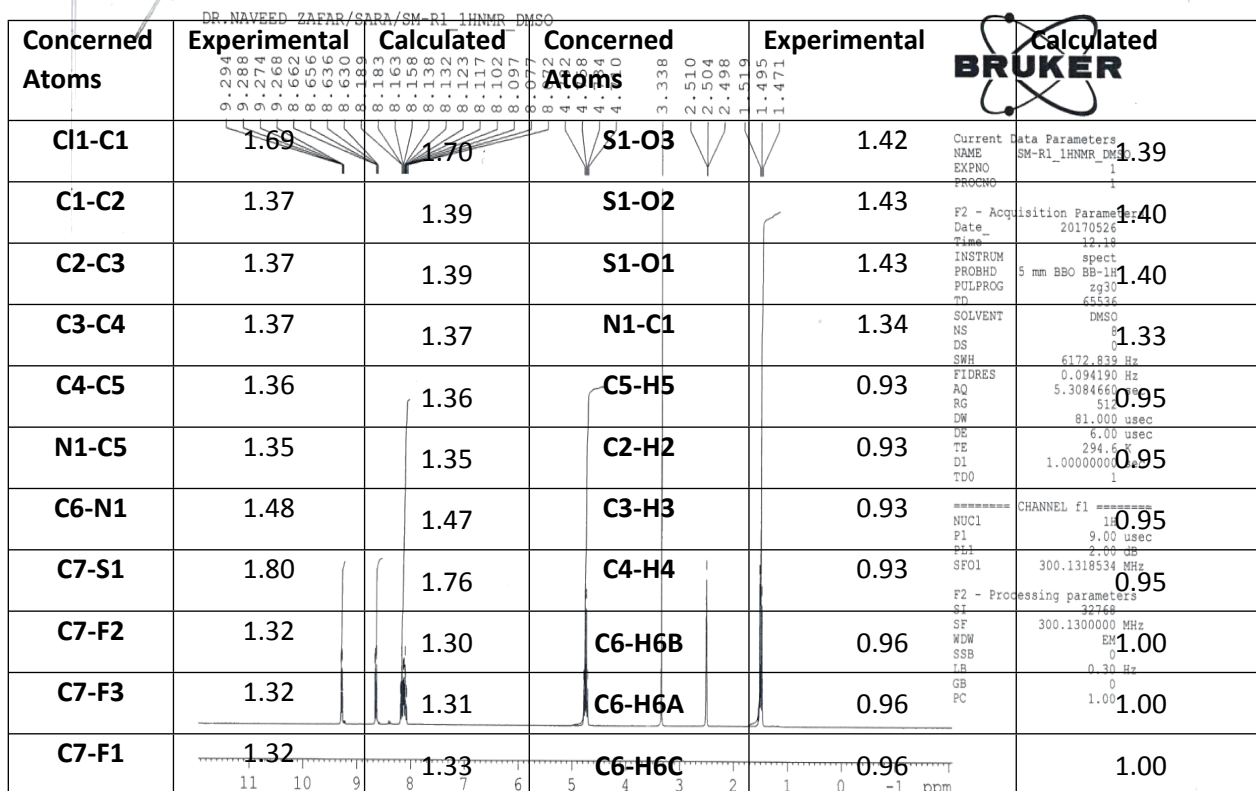

**Figure S6:**  $^1\text{H}$ ,  $^{13}\text{C}$ NMR, IR, bond lengths and bond angles of  $[\text{P}^2_{\text{Me}}][\text{CF}_3\text{SO}_3]$

DR.NAVEED ZAFAR/SARA/SRM-1\_13CNMR\_DMSO

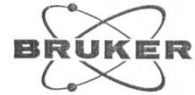

Current Data Parameters  
NAME SRM-1\_13CNMR\_DMSO  
EXPNO 1  
PROCNO 1

F2 - Acquisition Parameters  
Date\_ 20170717  
Time 16.21  
INSTRUM spect  
PROBHD 5 mm BBO BB-1H  
PULPROG zgpg30  
TD 35968  
SOLVENT DMSO  
NS 1024  
DS 0  
SWH 17985.611 Hz  
FIDRES 0.500045 Hz  
AQ 0.9999604 sec  
RG 32768  
DW 27.800 usec  
DE 6.00 usec  
TE 297.6 K  
D1 2.00000000 sec  
d11 0.03000000 sec  
DELTA 1.89999998 sec  
TD0 1

===== CHANNEL f1 =====  
NUC1 13C  
P1 6.00 usec  
PL1 -5.00 dB  
SFO1 75.4752953 MHz

===== CHANNEL f2 =====  
CPDPRG2 waltz16  
NUC2 1H  
PCPD2 80.00 usec  
PL2 2.00 dB  
PL12 20.98 dB  
PL13 20.00 dB  
SFO2 300.1312005 MHz

F2 - Processing parameters  
SI 32768  
SF 75.4677490 MHz  
WDW EM  
SSB 0  
LB 1.00 Hz  
GB 0  
PC 1.40

Transmittance [%]

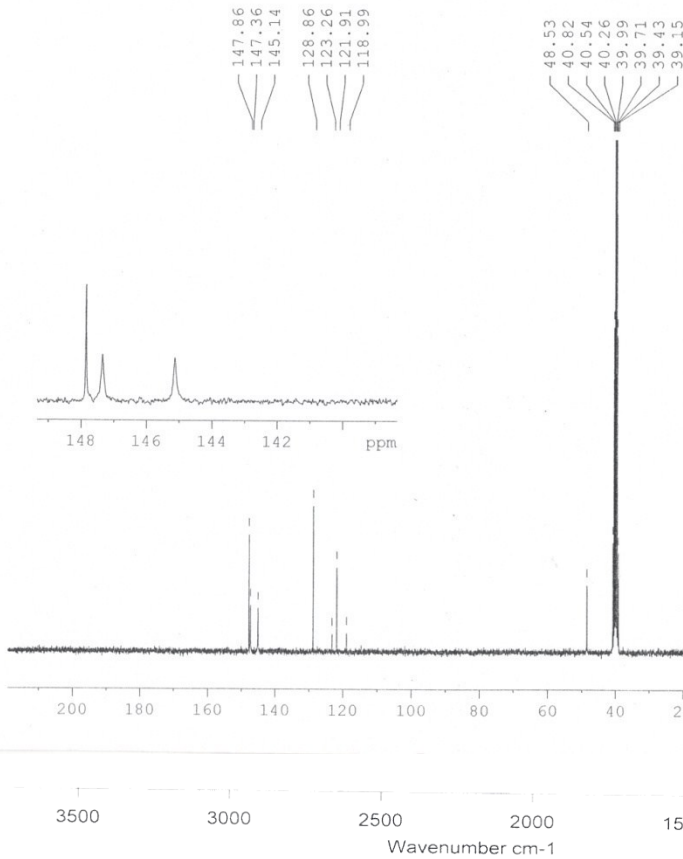

Sample Name: SRE 1

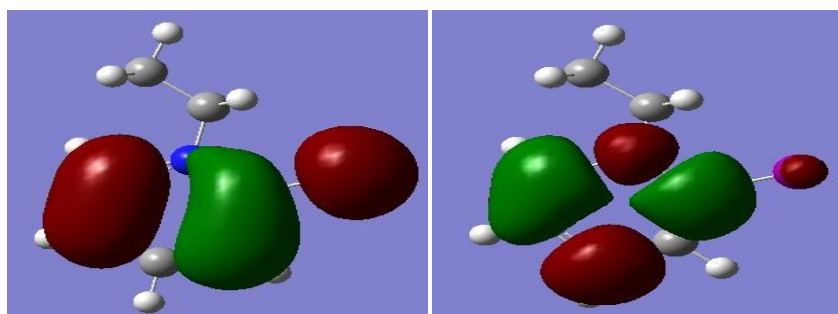

HOMO (Gaussian)

LUMO (Gaussian)

Bond angles

| Concerned Atoms | Experimental | Calculated | Concerned Atoms | Experimental | Calculated |
|-----------------|--------------|------------|-----------------|--------------|------------|
| C5-C4-C3        | 114.5        | 119.2      | C4-C5-H5        | 114.2        | 114.1      |
| C4-C3-C2        | 113.7        | 119.2      | N1-C6-H6A       | 110.0        | 109.1      |
| C3-C2-C1        | 130.6        | 120.3      | N1-C6-H6B       | 109.9        | 108.7      |
| I1-C1-N1        | 117.7        | 125.5      | N1-C6-C7        | 109.1        | 108.3      |
| N1-C5-C4        | 131.5        | 121.6      | H6A-C6-H6B      | 108.2        | 107.8      |
| I1-C1-C2        | 127.7        | 115.1      | H6A-C6-C7       | 109.9        | 108.9      |
| N1-C6-C7        | 109.1        | 109.8      | H6B-C6-C7       | 109.8        | 108.9      |
| C1-N1-C6        | 114.7        | 115.4      | C6-C7-H7A       | 109.5        | 108.7      |
| C5-N1-C6        | 130.1        | 131.0      | C6-C7-H7B       | 109.5        | 108.7      |

|                 |       |       |                   |       |       |
|-----------------|-------|-------|-------------------|-------|-------|
| <b>C1-I1-I2</b> | 177.5 | 178.4 | <b>C6-C7-H7C</b>  | 109.5 | 108.7 |
| <b>C1-C2-H2</b> | 114.6 | 114.5 | <b>H7A-C7-H7B</b> | 109.5 | 108.7 |
| <b>H2-C2-C3</b> | 114.8 | 113.9 | <b>N1-C1-C2</b>   | 114.6 | 114.4 |
| <b>C2-C3-H3</b> | 123.1 | 122.4 | <b>H7A-C7-H7C</b> | 109.5 | 108.9 |
| <b>H3-C3-C4</b> | 123.2 | 122.5 | <b>H7B-C7-H7C</b> | 109.4 | 108.9 |

### Bond lengths

| Concerned Atoms | Experimental values | Computed values | Concerned Atoms | Experimental values | Computed values |
|-----------------|---------------------|-----------------|-----------------|---------------------|-----------------|
| <b>N1-C1</b>    | 1.09                | 1.10            | <b>C1-I1</b>    | 2.02                | 2.12            |
| <b>C1-C2</b>    | 1.31                | 1.36            | <b>C2-H</b>     | 0.93                | 1.00            |
| <b>C2-C3</b>    | 1.33                | 1.35            | <b>C3-H</b>     | 0.93                | 1.00            |
| <b>C3-C4</b>    | 1.12                | 1.23            | <b>C4-H</b>     | 0.93                | 1.00            |
| <b>C4-C5</b>    | 1.31                | 1.35            | <b>C5-H</b>     | 0.93                | 1.00            |
| <b>N1-C6</b>    | 1.43                | 1.43            | <b>C6-H</b>     | 0.97                | 1.02            |
| <b>C6-C7</b>    | 1.24                | 1.25            | <b>C6-H</b>     | 0.97                | 1.01            |
| <b>N1-C5</b>    | 1.29                | 1.34            | <b>C7-H</b>     | 0.96                | 1.00            |
| <b>I1-I2</b>    | 3.24                | 3.36            | <b>C7-H</b>     | 0.96                | 1.00            |

**Figure S7:**  $^1\text{H}$ ,  $^{13}\text{C}$ NMR, IR spectra, HOMO LUMO, bond lengths and bond angles of  $[\text{P}^3_{\text{Et}}][\text{I}^-]$

**Table 1:** Crystal structure Data of S3

Table 1: Crystal data and structure refinement for a.

|                     |                    |
|---------------------|--------------------|
| Identification code | 8A                 |
| Empirical formula   | C10 H13 F3 N2 O3 S |
| Formula weight      | 298.28             |
| Temperature         | 100(2) K           |
| Wavelength          | 1.54178 Å          |



|                                   |                                             |                       |
|-----------------------------------|---------------------------------------------|-----------------------|
| Crystal system                    | Orthorhombic                                |                       |
| Space group                       | Pbcn                                        |                       |
| Unit cell dimensions              | a = 15.5634(3) Å                            | $\alpha = 90^\circ$ . |
|                                   | b = 12.4382(2) Å                            | $\beta = 90^\circ$ .  |
|                                   | c = 12.8282(3) Å                            | $\gamma = 90^\circ$ . |
| Volume                            | 2483.29(9) Å <sup>3</sup>                   |                       |
| Z                                 | 8                                           |                       |
| Density (calculated)              | 1.596 Mg/m <sup>3</sup>                     |                       |
| Absorption coefficient            | 2.780 mm <sup>-1</sup>                      |                       |
| F(000)                            | 1232                                        |                       |
| Crystal size                      | 0.170 x 0.050 x 0.040 mm <sup>3</sup>       |                       |
| Theta range for data collection   | 4.551 to 68.305°.                           |                       |
| Index ranges                      | -18 ≤ h ≤ 18, -14 ≤ k ≤ 14, -15 ≤ l ≤ 15    |                       |
| Reflections collected             | 36806                                       |                       |
| Independent reflections           | 2282 [R(int) = 0.0771]                      |                       |
| Completeness to theta = 67.679°   | 100.0 %                                     |                       |
| Refinement method                 | Full-matrix least-squares on F <sup>2</sup> |                       |
| Data / restraints / parameters    | 2282 / 0 / 177                              |                       |
| Goodness-of-fit on F <sup>2</sup> | 1.049                                       |                       |
| Final R indices [I > 2σ(I)]       | R1 = 0.0580, wR2 = 0.1377                   |                       |
| R indices (all data)              | R1 = 0.0684, wR2 = 0.1446                   |                       |
| Extinction coefficient            | n/a                                         |                       |
| Largest diff. peak and hole       | 1.159 and -0.746 e.Å <sup>-3</sup>          |                       |

**Atomic coordinates ( x 10<sup>4</sup>) and equivalent isotropic displacement parameters (Å<sup>2</sup>x 10<sup>3</sup>)**

**for a. U(eq) is defined as one third of the trace of the orthogonalized U<sup>ij</sup> tensor.**

---

|       | x       | y       | z       | U(eq)  |
|-------|---------|---------|---------|--------|
| S(1)  | 2443(1) | 6040(1) | 5767(1) | 17(1)  |
| F(1)  | 894(2)  | 5291(2) | 5554(4) | 104(2) |
| F(2)  | 1788(1) | 4081(2) | 5875(2) | 32(1)  |
| F(3)  | 1746(3) | 4798(3) | 4369(2) | 99(2)  |
| O(1)  | 2345(2) | 6101(2) | 6870(2) | 50(1)  |
| O(2)  | 3253(2) | 5576(2) | 5474(3) | 46(1)  |
| O(3)  | 2196(2) | 6945(2) | 5156(2) | 32(1)  |
| N(1)  | 4128(2) | 4665(2) | 2998(2) | 14(1)  |
| N(2)  | 3768(2) | 6459(2) | 3240(2) | 16(1)  |
| C(1)  | 3932(2) | 7474(3) | 3596(3) | 23(1)  |
| C(2)  | 4672(2) | 7707(3) | 4100(3) | 27(1)  |
| C(3)  | 5262(2) | 6879(3) | 4275(2) | 21(1)  |
| C(4)  | 5089(2) | 5857(3) | 3949(2) | 16(1)  |
| C(5)  | 4325(2) | 5635(2) | 3398(2) | 13(1)  |
| C(6)  | 2971(2) | 6281(3) | 2649(3) | 22(1)  |
| C(7)  | 4699(2) | 3727(2) | 2979(2) | 13(1)  |
| C(8)  | 4142(2) | 2714(2) | 2962(3) | 17(1)  |
| C(9)  | 4689(2) | 1693(3) | 2960(3) | 21(1)  |
| C(10) | 1688(2) | 4992(3) | 5367(3) | 28(1)  |

**Bond lengths [Å] and angles [A°] for a.**

---

S(1)-O(3) 1.425(3)

|             |          |
|-------------|----------|
| S(1)-O(1)   | 1.426(3) |
| S(1)-O(2)   | 1.437(3) |
| S(1)-C(10)  | 1.828(4) |
| F(1)-C(10)  | 1.313(5) |
| F(2)-C(10)  | 1.315(4) |
| F(3)-C(10)  | 1.306(5) |
| N(1)-C(5)   | 1.346(4) |
| N(1)-C(7)   | 1.468(4) |
| N(1)-H(5)   | 0.84(4)  |
| N(2)-C(5)   | 1.358(4) |
| N(2)-C(1)   | 1.367(4) |
| N(2)-C(6)   | 1.470(4) |
| C(1)-C(2)   | 1.352(5) |
| C(1)-H(1)   | 0.9500   |
| C(2)-C(3)   | 1.398(5) |
| C(2)-H(2)   | 0.9500   |
| C(3)-C(4)   | 1.366(5) |
| C(3)-H(3)   | 0.9500   |
| C(4)-C(5)   | 1.412(4) |
| C(4)-H(4)   | 0.9500   |
| C(6)-H(6A)  | 0.9800   |
| C(6)-H(6B)  | 0.9800   |
| C(6)-H(6C)  | 0.9800   |
| C(7)-C(8)   | 1.529(4) |
| C(7)-C(7)#1 | 1.546(6) |

|                 |            |
|-----------------|------------|
| C(7)-H(7)       | 1.0000     |
| C(8)-C(9)       | 1.528(4)   |
| C(8)-H(8A)      | 0.9900     |
| C(8)-H(8B)      | 0.9900     |
| C(9)-C(9)#1     | 1.526(7)   |
| C(9)-H(9A)      | 0.9900     |
| C(9)-H(9B)      | 0.9900     |
| O(3)-S(1)-O(1)  | 118.35(19) |
| O(3)-S(1)-O(2)  | 114.25(18) |
| O(1)-S(1)-O(2)  | 112.0(2)   |
| O(3)-S(1)-C(10) | 103.68(16) |
| O(1)-S(1)-C(10) | 104.37(18) |
| O(2)-S(1)-C(10) | 101.78(18) |
| C(5)-N(1)-C(7)  | 125.5(3)   |
| C(5)-N(1)-H(5)  | 121(3)     |
| C(7)-N(1)-H(5)  | 113(3)     |
| C(5)-N(2)-C(1)  | 121.9(3)   |
| C(5)-N(2)-C(6)  | 120.1(3)   |
| C(1)-N(2)-C(6)  | 118.0(3)   |
| C(2)-C(1)-N(2)  | 121.2(3)   |
| C(2)-C(1)-H(1)  | 119.4      |
| N(2)-C(1)-H(1)  | 119.4      |
| C(1)-C(2)-C(3)  | 118.6(3)   |
| C(1)-C(2)-H(2)  | 120.7      |

|                  |          |
|------------------|----------|
| C(3)-C(2)-H(2)   | 120.7    |
| C(4)-C(3)-C(2)   | 120.5(3) |
| C(4)-C(3)-H(3)   | 119.8    |
| C(2)-C(3)-H(3)   | 119.8    |
| C(3)-C(4)-C(5)   | 120.1(3) |
| C(3)-C(4)-H(4)   | 119.9    |
| C(5)-C(4)-H(4)   | 119.9    |
| N(1)-C(5)-N(2)   | 118.3(3) |
| N(1)-C(5)-C(4)   | 123.9(3) |
| N(2)-C(5)-C(4)   | 117.7(3) |
| N(2)-C(6)-H(6A)  | 109.5    |
| N(2)-C(6)-H(6B)  | 109.5    |
| H(6A)-C(6)-H(6B) | 109.5    |
| N(2)-C(6)-H(6C)  | 109.5    |
| H(6A)-C(6)-H(6C) | 109.5    |
| H(6B)-C(6)-H(6C) | 109.5    |
| N(1)-C(7)-C(8)   | 108.2(2) |
| N(1)-C(7)-C(7)#1 | 112.4(2) |
| C(8)-C(7)-C(7)#1 | 109.4(2) |
| N(1)-C(7)-H(7)   | 109.0    |
| C(8)-C(7)-H(7)   | 109.0    |
| C(7)#1-C(7)-H(7) | 109.0    |
| C(9)-C(8)-C(7)   | 111.7(3) |
| C(9)-C(8)-H(8A)  | 109.3    |
| C(7)-C(8)-H(8A)  | 109.3    |

|                   |          |
|-------------------|----------|
| C(9)-C(8)-H(8B)   | 109.3    |
| C(7)-C(8)-H(8B)   | 109.3    |
| H(8A)-C(8)-H(8B)  | 107.9    |
| C(9)#1-C(9)-C(8)  | 110.8(2) |
| C(9)#1-C(9)-H(9A) | 109.5    |
| C(8)-C(9)-H(9A)   | 109.5    |
| C(9)#1-C(9)-H(9B) | 109.5    |
| C(8)-C(9)-H(9B)   | 109.5    |
| H(9A)-C(9)-H(9B)  | 108.1    |
| F(3)-C(10)-F(1)   | 107.2(4) |
| F(3)-C(10)-F(2)   | 108.6(3) |
| F(1)-C(10)-F(2)   | 105.4(3) |
| F(3)-C(10)-S(1)   | 111.3(3) |
| F(1)-C(10)-S(1)   | 110.6(3) |
| F(2)-C(10)-S(1)   | 113.5(2) |

---

Symmetry transformations used to generate equivalent atoms:

#1 -x+1,y,-z+1/2

**Anisotropic displacement parameters ( $\text{\AA}^2 \times 10^3$ ) for a. The anisotropic**

**displacement factor exponent takes the form:  $-2\pi^2 [ h^2 a^{*2} U^{11} + \dots + 2 h k a^* b^* U^{12} ]$**

---

|      | U <sup>11</sup> | U <sup>22</sup> | U <sup>33</sup> | U <sup>23</sup> | U <sup>13</sup> | U <sup>12</sup> |
|------|-----------------|-----------------|-----------------|-----------------|-----------------|-----------------|
| S(1) | 16(1)           | 15(1)           | 21(1)           | 0(1)            | -3(1)           | -1(1)           |
| F(1) | 19(1)           | 34(2)           | 257(6)          | 23(2)           | -33(2)          | -4(1)           |

|       |        |       |       |        |        |        |
|-------|--------|-------|-------|--------|--------|--------|
| F(2)  | 33(1)  | 20(1) | 42(1) | 9(1)   | -14(1) | -6(1)  |
| F(3)  | 201(4) | 65(2) | 32(2) | 2(1)   | -28(2) | -83(3) |
| O(1)  | 89(3)  | 32(2) | 27(2) | -11(1) | 11(2)  | -22(2) |
| O(2)  | 19(1)  | 33(2) | 84(2) | 18(2)  | 5(1)   | 6(1)   |
| O(3)  | 25(1)  | 18(1) | 51(2) | 11(1)  | -14(1) | -1(1)  |
| N(1)  | 10(1)  | 14(1) | 17(1) | -1(1)  | -2(1)  | 2(1)   |
| N(2)  | 16(1)  | 16(1) | 17(1) | -2(1)  | -1(1)  | 2(1)   |
| C(1)  | 28(2)  | 14(2) | 27(2) | -6(1)  | -1(2)  | 5(1)   |
| C(2)  | 32(2)  | 19(2) | 30(2) | -10(2) | -2(2)  | -2(2)  |
| C(3)  | 21(2)  | 26(2) | 15(2) | -4(1)  | -1(1)  | -6(1)  |
| C(4)  | 16(2)  | 19(2) | 12(1) | 0(1)   | 2(1)   | 0(1)   |
| C(5)  | 13(1)  | 15(2) | 10(1) | 0(1)   | 4(1)   | 0(1)   |
| C(6)  | 15(2)  | 19(2) | 31(2) | -4(1)  | -6(1)  | 5(1)   |
| C(7)  | 10(1)  | 12(2) | 16(2) | 0(1)   | -1(1)  | 2(1)   |
| C(8)  | 15(2)  | 16(2) | 20(2) | 2(1)   | 1(1)   | -3(1)  |
| C(9)  | 23(2)  | 13(2) | 26(2) | 3(1)   | -2(2)  | -2(1)  |
| C(10) | 29(2)  | 20(2) | 36(2) | 7(2)   | -17(2) | -6(2)  |

---

**Hydrogen coordinates (  $\times 10^4$ ) and isotropic displacement parameters ( $\text{\AA}^2 \times 10^3$ )**

**for a.**

---

|      | x    | y    | z    | U(eq) |
|------|------|------|------|-------|
| H(1) | 3519 | 8025 | 3488 | 28    |
| H(2) | 4788 | 8419 | 4330 | 32    |

---

|       |          |          |          |        |
|-------|----------|----------|----------|--------|
| H(3)  | 5787     | 7029     | 4623     | 25     |
| H(4)  | 5484     | 5294     | 4094     | 19     |
| H(6A) | 3111     | 6002     | 1955     | 32     |
| H(6B) | 2660     | 6962     | 2580     | 32     |
| H(6C) | 2611     | 5759     | 3019     | 32     |
| H(7)  | 5056     | 3725     | 3628     | 15     |
| H(8A) | 3762     | 2710     | 3581     | 20     |
| H(8B) | 3774     | 2723     | 2333     | 20     |
| H(9A) | 5016     | 1646     | 3620     | 25     |
| H(9B) | 4309     | 1056     | 2915     | 25     |
| H(5)  | 3670(30) | 4570(30) | 2660(30) | 24(10) |

---

**Torsion angles [A°] for a.**

---

|                     |           |
|---------------------|-----------|
| C(5)-N(2)-C(1)-C(2) | 1.8(5)    |
| C(6)-N(2)-C(1)-C(2) | -176.7(3) |
| N(2)-C(1)-C(2)-C(3) | -1.6(5)   |
| C(1)-C(2)-C(3)-C(4) | -0.5(5)   |
| C(2)-C(3)-C(4)-C(5) | 2.3(5)    |
| C(7)-N(1)-C(5)-N(2) | 171.9(3)  |
| C(7)-N(1)-C(5)-C(4) | -6.3(5)   |
| C(1)-N(2)-C(5)-N(1) | -178.2(3) |
| C(6)-N(2)-C(5)-N(1) | 0.3(4)    |
| C(1)-N(2)-C(5)-C(4) | 0.0(4)    |
| C(6)-N(2)-C(5)-C(4) | 178.6(3)  |
| C(3)-C(4)-C(5)-N(1) | 176.1(3)  |



|                       |           |
|-----------------------|-----------|
| C(3)-C(4)-C(5)-N(2)   | -2.1(4)   |
| C(5)-N(1)-C(7)-C(8)   | 153.4(3)  |
| C(5)-N(1)-C(7)-C(7)#1 | -85.7(4)  |
| N(1)-C(7)-C(8)-C(9)   | -179.1(3) |
| C(7)#1-C(7)-C(8)-C(9) | 58.3(4)   |
| C(7)-C(8)-C(9)-C(9)#1 | -56.5(4)  |
| O(3)-S(1)-C(10)-F(3)  | 59.4(4)   |
| O(1)-S(1)-C(10)-F(3)  | -176.1(3) |
| O(2)-S(1)-C(10)-F(3)  | -59.5(4)  |
| O(3)-S(1)-C(10)-F(1)  | -59.6(4)  |
| O(1)-S(1)-C(10)-F(1)  | 64.9(4)   |
| O(2)-S(1)-C(10)-F(1)  | -178.4(3) |
| O(3)-S(1)-C(10)-F(2)  | -177.8(3) |
| O(1)-S(1)-C(10)-F(2)  | -53.2(3)  |
| O(2)-S(1)-C(10)-F(2)  | 63.4(3)   |

---

Symmetry transformations used to generate equivalent atoms:

#1  $-x+1, y, -z+1/2$

**Hydrogen bonds for a [Å and °].**

---

| D-H...A            | d(D-H) | d(H...A) | d(D...A) | <(DHA) |
|--------------------|--------|----------|----------|--------|
| C(1)-H(1)...F(3)#2 | 0.95   | 2.51     | 3.233(4) | 132.7  |
| C(2)-H(2)...F(1)#3 | 0.95   | 2.36     | 3.165(5) | 142.4  |
| C(4)-H(4)...O(2)#4 | 0.95   | 2.31     | 3.221(4) | 160.4  |

|                     |         |         |          |        |
|---------------------|---------|---------|----------|--------|
| C(6)-H(6B)...O(1)#5 | 0.98    | 2.58    | 3.442(5) | 147.4  |
| C(6)-H(6C)...F(3)   | 0.98    | 2.50    | 3.450(5) | 163.9  |
| N(1)-H(5)...O(1)#6  | 0.84(4) | 2.45(4) | 3.271(5) | 167(4) |

---

Symmetry transformations used to generate equivalent atoms:

#1  $-x+1, y, -z+1/2$  #2  $-x+1/2, y+1/2, z$  #3  $x+1/2, -y+3/2, -z+1$

#4  $-x+1, -y+1, -z+1$  #5  $-x+1/2, -y+3/2, z-1/2$  #6  $x, -y+1, z-1/2$
